# Supplementary material for: Structural Characteristics of Rehmannia glutinosa Polysaccharides Treated Using Different Decolorization Processes and Their Antioxidant Effects in Intestinal Epithelial Cells
Source: MDPI journal article supplement (doi:10.3390/foods11213449), 2022-10-31
Supplement: s1 [file s1]

## Supplementary data

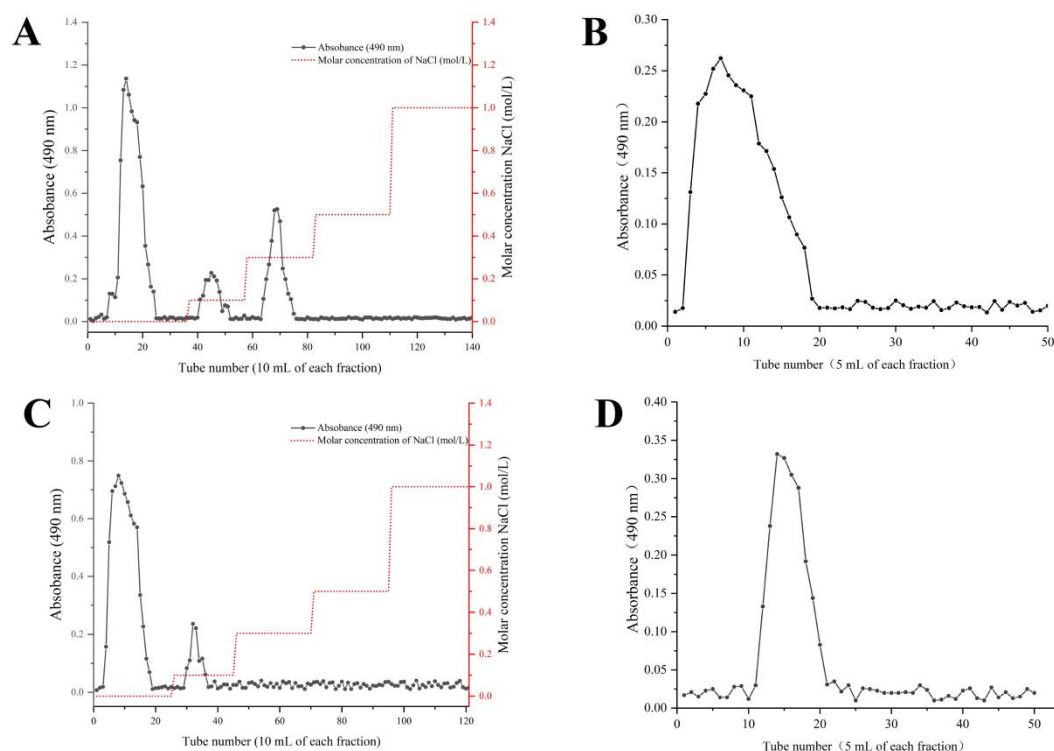

Figure S1. Separation of RGP-1 (A) and RGP-2 (C) using a DEAE-52 cellulose column. Elution profiles of RGP-1-A (B) and RGP-2-A (D) separated using a Sephadex G-100 column. RGP-1-A: *Rehmannia glutinosa* polysaccharide decolorized by AB-8 macroporous resin, RGP-2-A: *Rehmannia glutinosa* polysaccharide decolorized by H<sub>2</sub>O<sub>2</sub>.

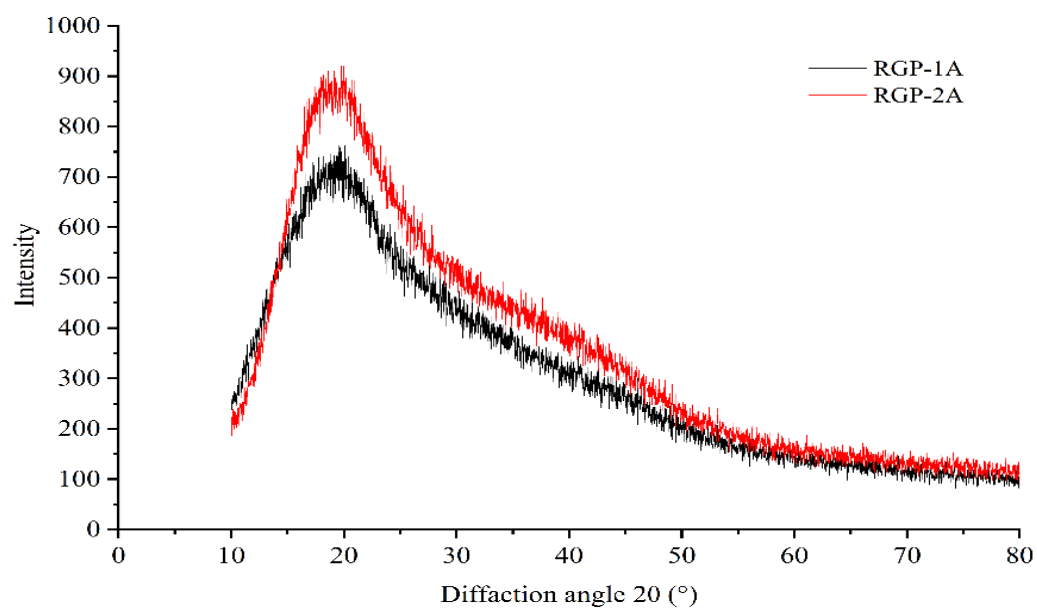

Figure S2. X-ray diffraction patterns of RGP-1-A (A) and RGP-2-A (B).

RGP-1-A: *Rehmannia glutinosa* polysaccharide decolorized by AB-8 macroporous resin, RGP-2-A: *Rehmannia glutinosa* polysaccharide decolorized by H<sub>2</sub>O<sub>2</sub>.

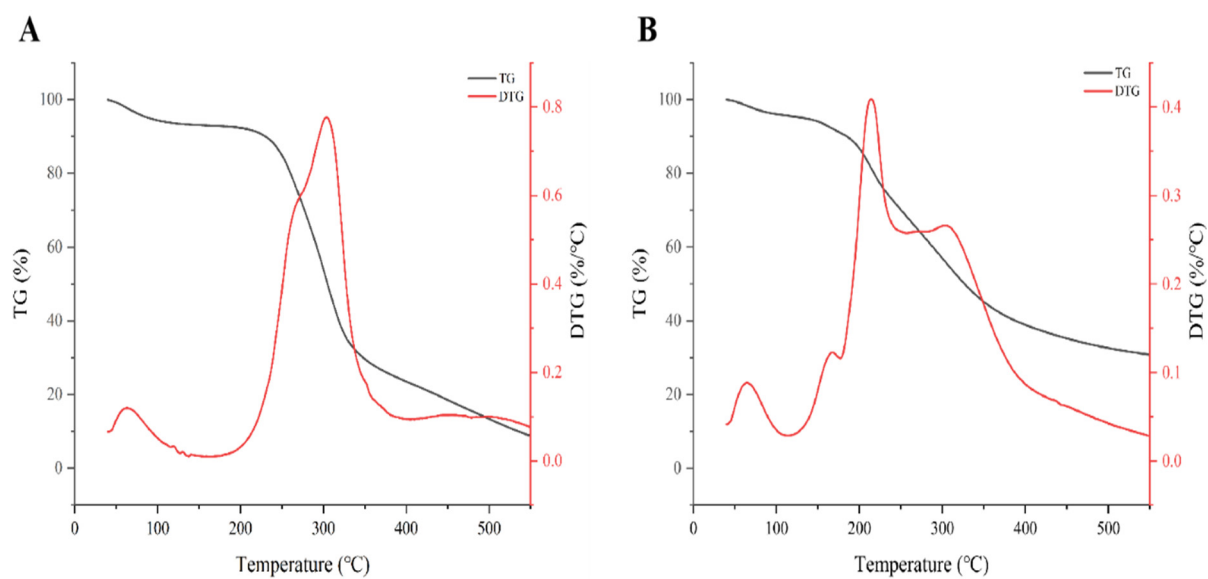

Figure S3. Thermogravimetry analysis patterns of RGP-1-A (A) and RGP-2-A (B). RGP-1-A: *Rehmannia glutinosa* polysaccharide decolorized by AB-8 macroporous resin, RGP-2-A: *Rehmannia glutinosa* polysaccharide decolorized by  $H_2O_2$ .

Table S1 Primer sequences used in quantitative real-time polymerase chain reaction.

| Gene      |                | Primer sequence 5'-3'    | PCR                  |
|-----------|----------------|--------------------------|----------------------|
|           |                |                          | product<br>size (bp) |
| Keap1     | Forward primer | ATGGCGGGGCCTCTGA         | 114                  |
|           | Reverse primer | CTCAGGGGCAGAAATTGGGT     |                      |
| Nrf2      | Forward primer | AGCGGATTGCTCGTAGACAG     | 155                  |
|           | Reverse primer | TCAATCAAATCCATGTCCTTGGC  |                      |
| caspase-3 | Forward primer | GCCAGGAATAGTAACCAGGTGCTG | 112                  |
|           | Reverse primer | TGTGGGATTGAGACGGACAGTGG  |                      |
| HO-1      | Forward primer | CTGAGAATGCCGAGTTCAT      | 156                  |
|           | Reverse primer | GGAAGTAGAGGGGCGTGTAG     |                      |
| NQO1      | Forward primer | TGGTGGAGTCGGACCTCTATG    | 287                  |
|           | Reverse primer | CATGGCAGCGTAAGTGTAAGC    |                      |
| GAPDH     | Forward primer | GCCATCACAGCCACACAGAAGA   | 206                  |
|           | Reverse primer | CGGCAGGTCAGGTCAACAACAG   |                      |

Table S2. The program for real-time fluorescent quantitative PCR (RT-PCR)

| Reaction stage | Specific response | Cycle | temperature | time |
|----------------|-------------------|-------|-------------|------|
| 1              | Predegeneration   | 1     | 95°C        | 30 s |
| 2              | Cyclic reaction   | 40    | 95°C        | 10 s |
|                |                   |       | 60°C        | 30 s |
|                |                   |       | 95°C        | 15 s |
| 3              | Melting curve     | 1     | 60°C        | 60 s |
|                |                   |       | 95°C        | 15 s |
